# Supplementary material for: Antiosteoarthritic Effect of Morroniside in Chondrocyte Inflammation and Destabilization of Medial Meniscus-Induced Mouse Model
Source: MDPI journal article supplement (doi:10.3390/ijms22062987), 2021-03-15
Supplement: s1 [file s1]

## Antiosteoarthritic Effect of Morroniside in Chondrocyte Inflammation and Destabilization of Medial Meniscus-Induced Mouse Model

Eunkuk Park, Chang Gun Lee, Seong Jae Han, Seung Hee Yun, Seokjin Hwang, Hyoju Jeon, Jeonghyun Kim, Chun Whan Choi, Siyoung Yang and Seon-Yong Jeong

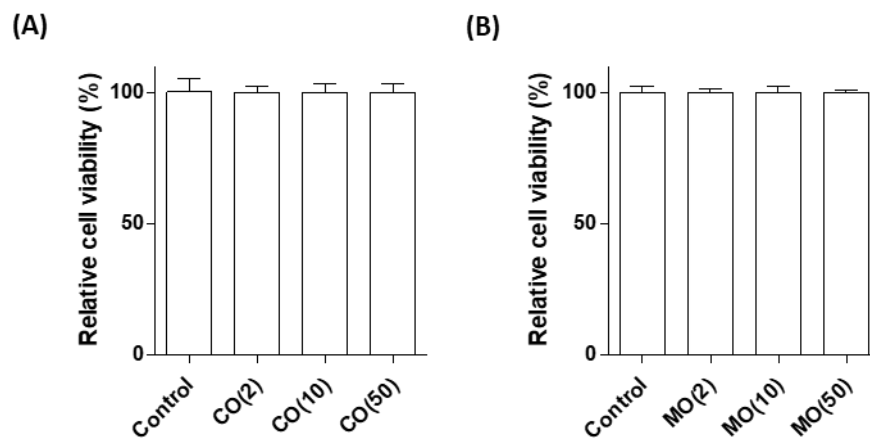

**Supplementary Figure S1.** Effects of *Cornus officinalis* (CO) extract and morroniside (MO) on mouse primary chondrocytes. Primary chondrocytes were incubated with different concentrations of (A) CO extract (0, 2, 10, and 50 µg/mL) and (B) MO (0, 2, 10, and 50 µM) for 48 h. Cell viability was examined by D-Plus™ CCK cell viability assay kit.

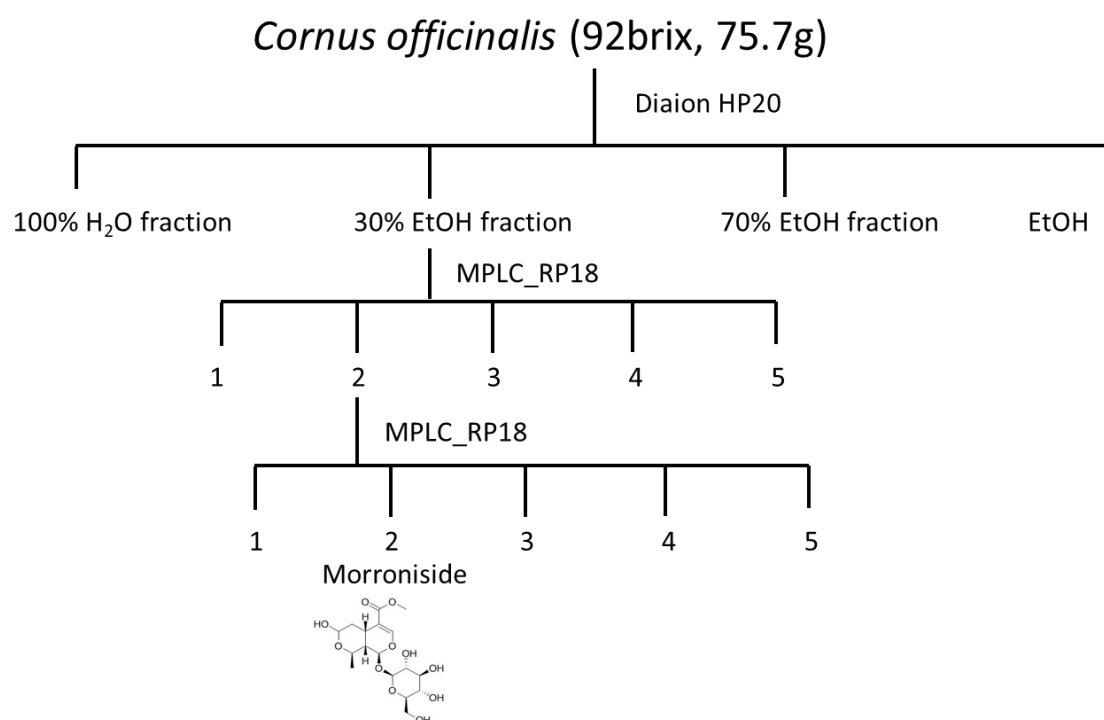

**Supplementary Figure S2.** Fractionation and isolation of the bioactive component from *Cornus officinalis* extract.
